# Supplementary material for: Interepidemic Respiratory Syncytial Virus during the COVID-19 Pandemic
Source: PubMed Central journal article supplement (PMC9241888; doi:10.1128/spectrum.00947-22), 2022-04-25

1 **Supplemental Material**

2

3 **Ethics Statement.** This study was reviewed and approved by the Institutional Review Board of  
4 Stanford University (protocol #48973).

5

6 **Assay Design.** The primer and probe sequences for the influenza A, influenza B, and respiratory  
7 syncytial virus (RSV) reverse transcription quantitative PCR (FLUABR RT-qPCR) are provided  
8 in Supplemental Table 1. The influenza A and B primers and probes were from the World Health  
9 Organization (WHO) protocol ([https://www.who.int/influenza/gisrs\\_laboratory/molecular\\_  
10 diagnosis/en/](https://www.who.int/influenza/gisrs_laboratory/molecular_diagnosis/en/)) and Zhang *et al.* (1), respectively. The RSV primers and probe were based on  
11 those described in Kamau *et al.* (2), but redesigned to account for additional RSV-A and RSV-B  
12 sequences. The Kamau *et al.* nucleocapsid target region of sequence MG640062 was aligned  
13 against all RSV-A and RSV-B sequences as of June 2020 using the “somewhat similar sequences  
14 (blastn)” option in NCBI-BLAST with the “max target sequences” set to 5000. After removal of  
15 duplicate sequences, there were 91 unique RSV-A and 70 unique RSV-B sequences at least one  
16 base different from any other sequence in the set. The occurrences of A, T, G, and C at each  
17 position along the target were counted to locate regions with least variability and the primer  
18 sequences were adjusted to place the 3’ ends on conserved bases. Two mismatches in the middle  
19 of the probe were converted to degenerate bases. Two RSV forward primers were included to  
20 accommodate sequence differences between RSV-A and RSV-B. RNaseP was used as internal  
21 control.

22

23 **Nucleic acid extraction and RT-qPCR set-up.** Total nucleic acids were extracted from 500 µL

24 on the QIA Symphony SP (Qiagen, Germantown, MD) using the QIASymphony DSP  
25 Virus/Pathogen Midi Kit according to the manufacturer's recommendations, and eluted in 60  $\mu$ L  
26 buffer AVE. RT-qPCR was performed using the Invitrogen Superscript III Platinum One-Step  
27 qRT-PCR kit (Invitrogen, Carlsbad, CA) on the Rotor-Gene Q instrument (Qiagen, Germantown,  
28 MD). Each 25  $\mu$ L reaction contained 12.5  $\mu$ L of 2X Buffer, 0.5  $\mu$ L of enzyme mix, 2  $\mu$ L of  
29 primer/probe mix, and 10  $\mu$ L of eluate. Cycling conditions were as follows: hold at 52°C for 15  
30 min, 94°C for 2 min, then 45 cycles of 94°C for 15 sec, 55°C for 40 sec, and 68°C for 20 sec.  
31 Fluorescence was analyzed in the crimson (influenza A), yellow (internal control: RNaseP),  
32 orange (RSV), and green (influenza B) channels; the threshold was set at 0.05 for the green and  
33 yellow channels, 0.07 for the orange channel, and 0.06 for the crimson channel. Any  
34 amplification curve crossing these thresholds was considered positive for the corresponding viral  
35 RNA. Samples were considered to have failed extraction or contain inhibitory substances if the  
36 internal control (IC) did not amplify at a cycle threshold  $\leq 35$  in samples negative for all three  
37 viruses.

38  
39 **Analytical Evaluation.** 10-fold dilutions of quantified single-stranded DNA (ssDNA)  
40 (Supplemental Table 2) were run in triplicate revealing a linear range that extended from 8.08 to  
41 2.08  $\log_{10}$  copies/mL for all three targets (Supplemental Figure 1).

42  
43 The lower limit of 95% detection (LLOD) was determined using influenza A, influenza B and  
44 RSV positive specimens serially diluted using pooled negative nasopharyngeal swab samples in  
45 phosphate buffered saline. At least 95% of replicates were detected for each target at 50  
46 copies/mL; 20/20 for influenza A, 19/20 for influenza B, and 19/20 for RSV.

47

48 **Clinical Evaluation of the Multiplex RT-qPCR.** A total of 128 archived clinical nasopharyngeal  
49 swab samples in viral transport media previously tested using Xpert Flu/RSV (Cepheid,  
50 Sunnyvale, CA) were selected to assess performance of the FLUABR RT-qPCR. These samples  
51 included 33 positive influenza A, 31 positive influenza B, 32 positive RSV, and 32 samples  
52 negative for all three targets. Positive percent agreement was 100% (33/33) for influenza A, 96.8%  
53 (30/31) for influenza B, and 100% (32/32) for RSV. The single discrepant influenza B specimen  
54 was tested using the Panther Fusion FluA/B/RSV Assay (Hologic, Marlborough, MA) and found  
55 to be negative. Negative percent agreement was 98.9% (94/95) for influenza A, 100% (97/97) for  
56 influenza B, and 95.9% (92/96) for RSV. Three of the four RSV samples that were negative by  
57 Xpert Flu/RSV but positive by FLUABR RT-qPCR were positive when tested using the Panther  
58 Fusion FluA/B/RSV Assay. The single influenza A sample negative by Xpert Flu/RSV but positive  
59 by FLUABR RT-qPCR was negative when tested using the Panther Fusion FluA/B/RSV Assay.

60

61 **Screening of Clinical Samples submitted for SARS-CoV-2 RT-qPCR.** Total nucleic acids were  
62 extracted from 500  $\mu$ L on the QIA Symphony SP (Qiagen, Germantown, MD) using the  
63 QIASymphony DSP Virus/Pathogen Midi Kit according to the manufacturer's recommendations,  
64 and eluted in 60  $\mu$ L buffer AVE. These included 11,183 individual samples, as well as pools of 2  
65 (n=13), 3 (n=51), and 4 (n=1429) samples negative for SARS-CoV-2 RNA. Seventeen individual  
66 eluates were tested using the FLUABR RT-qPCR. The remaining eluates were combined in pools  
67 of 2 to 9 eluates. A total of 17,078 upper respiratory samples were screened using the FLUABR  
68 RT-qPCR.

69 **RSV Sequencing and Analysis.** Metagenomic RNA sequencing was performed as described  
70 previously (3). Briefly, 5 µL of extracted total nucleic acids was converted to cDNA and  
71 sequencing libraries were prepared using the NEBNext RNA ULTRA II kit (New England  
72 Biolabs) according to the manufacturer's instructions. Samples were sequenced on the NovaSeq  
73 6000 system (Illumina) using 150-nucleotide paired-end sequencing. Sequences were initially  
74 aligned to reference RSV-A (GenBank: MG642067.1) and RSV-B (MG642053.1) whole genome  
75 sequences using the bwasw module in BWA (version 0.7.9a-r786) with match score 2 and  
76 mismatch penalty -3 (options -a2 -b3).

77

78 Consensus whole genome sequence was generated from the RSV-B alignment bam file using  
79 samtools (version 0.1.19) mpileup followed by bcftools vcf2fq using default parameters. This  
80 consensus sequence was used to query GenBank and the resulting top BLAST hit was an RSV-B  
81 sequence (LC495297) from a specimen collected in Japan in August 2018 from a pediatric  
82 patient with respiratory failure. Using LC495297 as reference, the alignment and consensus  
83 generation was repeated as above, and the new consensus sequence was deposited in GenBank  
84 (OL321917).

85 **Supplemental Figure Legend**

86

87 **Supplemental Figure 1.** Linearity of the influenza A, influenza B, respiratory syncytial virus  
88 (RSV) reverse transcription quantitative PCR using serial 10-fold dilutions of single-stranded  
89 DNA run in triplicate from 8.08 to 2.08 log<sub>10</sub> copies/mL. Influenza A (A), influenza B (B), and  
90 RSV(C). The solid lines represent the linear least squares regression.

91 **Supplemental References**

92

93 1. Zhang H, Wang Y, Porter E, Lu N, Li Y, Yuan F, Lohman M, Noll L, Zheng W, Stoy C,  
94 Lang Y, Huber VC, Ma W, Peddireddi L, Fang Y, Shi J, Anderson G, Liu X, Bai J. 2019.  
95 Development of a multiplex real-time RT-PCR assay for simultaneous detection and  
96 differentiation of influenza A, B, C, and D viruses. *Diagn Microbiol Infect Dis* 95:59-66.

97 2. Kamau E, Agoti CN, Lewa CS, Oketch J, Owor BE, Otieno GP, Bett A, Cane PA, Nokes  
98 DJ. 2017. Recent sequence variation in probe binding site affected detection of  
99 respiratory syncytial virus group B by real-time RT-PCR. *J Clin Virol* 88:21-25.

100 3. Doan T, Sahoo MK, Ruder K, Huang C, Zhong L, Chen C, Hinterwirth A, Lin C,  
101 Gonzales JA, Pinsky BA, Acharya NR. 2021. Comprehensive pathogen detection for  
102 ocular infections. *J Clin Virol* 136:104759.

103

104 **Supplemental Table 1: Influenza A, Influenza B, and RSV Primer and Probe Sequences**

105

| Name               | Sequence (5'to 3')          | Final Concentration (nM) |
|--------------------|-----------------------------|--------------------------|
| <b>Primers</b>     |                             |                          |
| InfA-F             | GACCRATCCTGTCACCTCTGAC      | 300                      |
| InfA-R             | AGGGCATTYTGACAAAKCGTCTA     | 300                      |
| InfBv1-Fa          | GCAGAGCAGCGAGATCTTCAG       | 300                      |
| InfBv1-R           | CTTTYCCCATTCCATTTCATTGT     | 300                      |
| RSV_N1_Fa          | GAAGATGCAAATCATAAAATTCACAGG | 300                      |
| RSV_N1_Fb          | GAGGATGCTAACAACAACTTACTGG   | 300                      |
| RSV_N1_R           | TGATATCCMGCATCTTTRAGTAT     | 300                      |
| RNAseP_Fwd         | AGATTTGGACCTGCGAGCG         | 100                      |
| RNAseP_Rev         | GAGCGGCTGTCTCCACAAGT        | 100                      |
| <b>Probes</b>      |                             |                          |
| InfA-prb_Q705      | TGCAGTCCTCGCTCACTGGGCACG    | 100                      |
| InfBv1-prb_FAM     | CTGTGTTCATAGCTGAGACCATCTGC  | 100                      |
| RSV_N1_prb_cf610   | ATGTCYAGRTTAGGAAGRGAAG      | 100                      |
| RNAseP Probe cf560 | TTCTGACCTGAAGGCTCTGCGCG     | 50                       |

106 InfA, influenza A; InfB, influenza B; RSV, respiratory syncytial virus; Q705, Quasar 705; FAM, 6-  
 107 carboxyfluorescein; cf610, CalFluor 610; cf560, CalFluor 560  
 108 Primers were purchased from Integrated DNA Technologies (San Diego, California) and hydrolysis probes were  
 109 purchased from Biosearch Technologies (Petaluma, California).

110 **Table 2. Influenza A, Influenza B, and RSV single-stranded DNA Sequences**

111

| <b>Virus</b> | <b>Sequence</b>                                                                                                                                                                                           | <b>GenBank Reference</b>            |
|--------------|-----------------------------------------------------------------------------------------------------------------------------------------------------------------------------------------------------------|-------------------------------------|
| FluA-ssDNA   | CTAAAGACAAGACCAATCCTGTACCTCTGACTA<br>AGGGGATTTTAGGATTTGTGTTACGCTCACCGTG<br>CCCAGTGAGCGAGGACTGCAGCGTAGACGCTTTG<br>TCCAAAATGCCCTTAATGGGAAT                                                                  | MT624438.1<br>matrix protein 2 (M2) |
| FluB-ssDNA   | TCCTGGAAATTATTCAATGCAAGTAAACTAGGA<br>ACGCTCTGTGCTTTATGCGAGAAACAAGCATCAC<br>ATTCACACAGGGCTCATAGCAGAGCAGCGAGATC<br>TTCAGTGCCTGGAGTGAGACGAGAAATGCAGATG<br>GTCTCAGCTATGAACACAGCAAAAACAATGAATG<br>GAATGGGAAAAG | MT600428.1<br>matrix protein 1 (M1) |
| RSV-N1-ssDNA | ATTAATCACTGAAGATGCAAATCATAAATTCACA<br>GGATTAATAGGTATGTTATATGCTATGTCCAGGTT<br>AGGAAGGGAAGACACTATAAAGATACTTAAAGA<br>TGCTGGATATCATGTTAAAGCT                                                                  | MG642062.1<br>Nucleoprotein (N)     |

112 FluA, influenza A; FluB, influenza B; RSV, respiratory syncytial virus; ssDNA, single-stranded DNA  
 113 Purchased from Integrated DNA Technologies (San Diego, California)

114



# Supplemental Figure 1

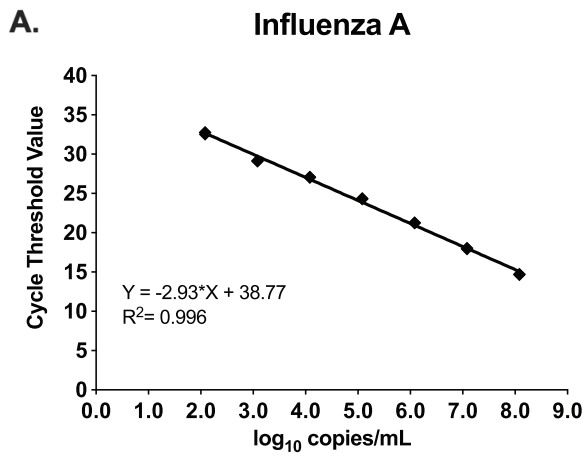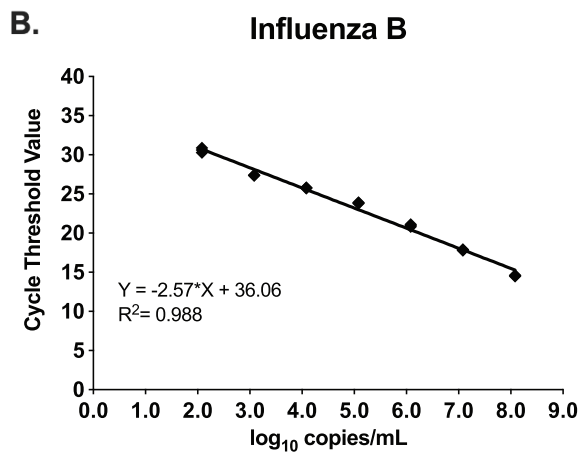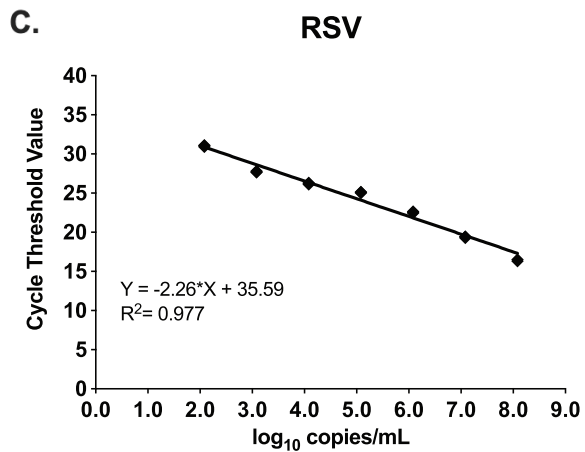

Supplement: spectrum.00947-22-s001.pdf [file spectrum.00947-22-s001.pdf]
